# Supplementary material
Source: PubMed Central journal article supplement (PMC4849421)
Supplement: GRSB-Suppl.1-2016-011-s001.pdf [file GRSB-Suppl.1-2016-011-s001.pdf]

Fig.S1

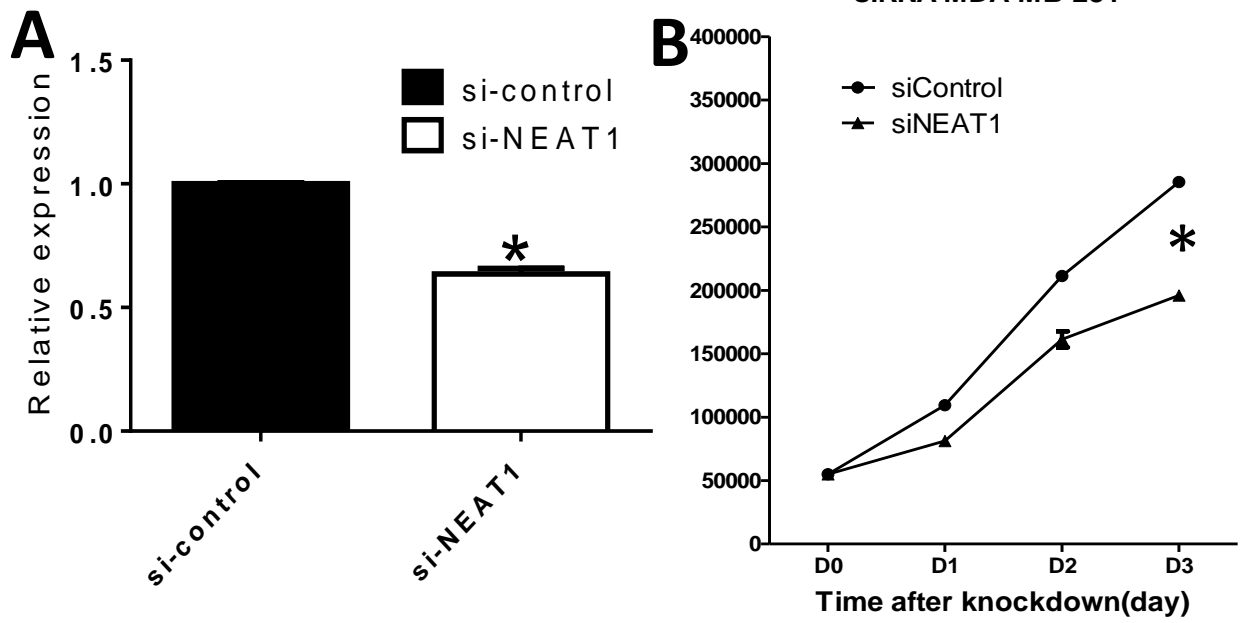

Fig.S2

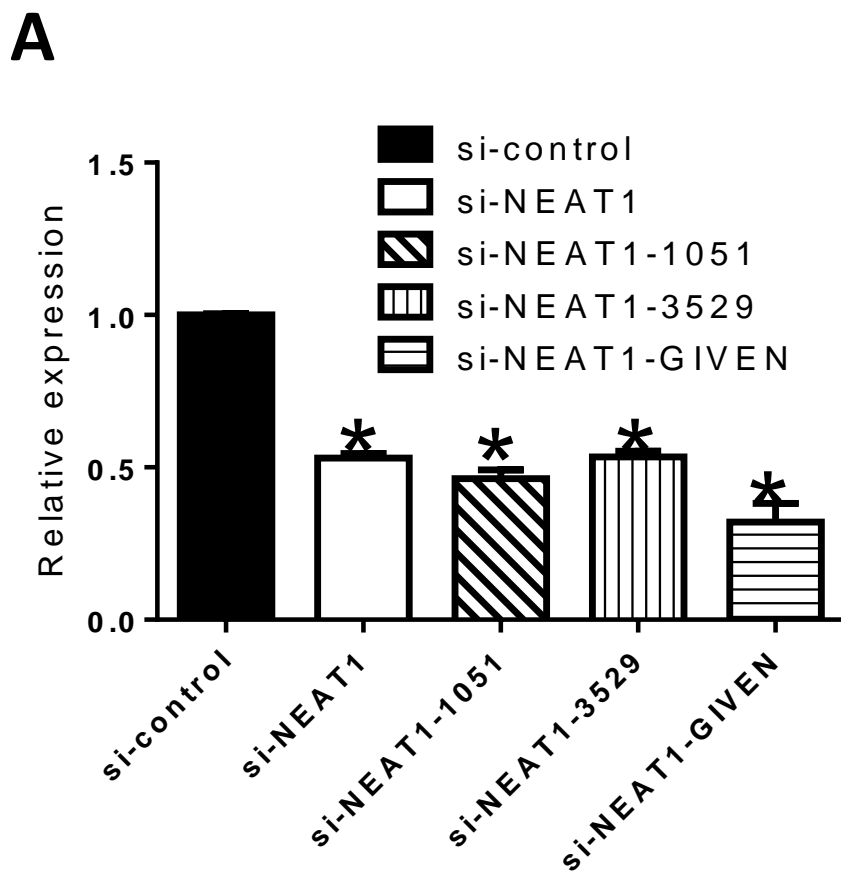

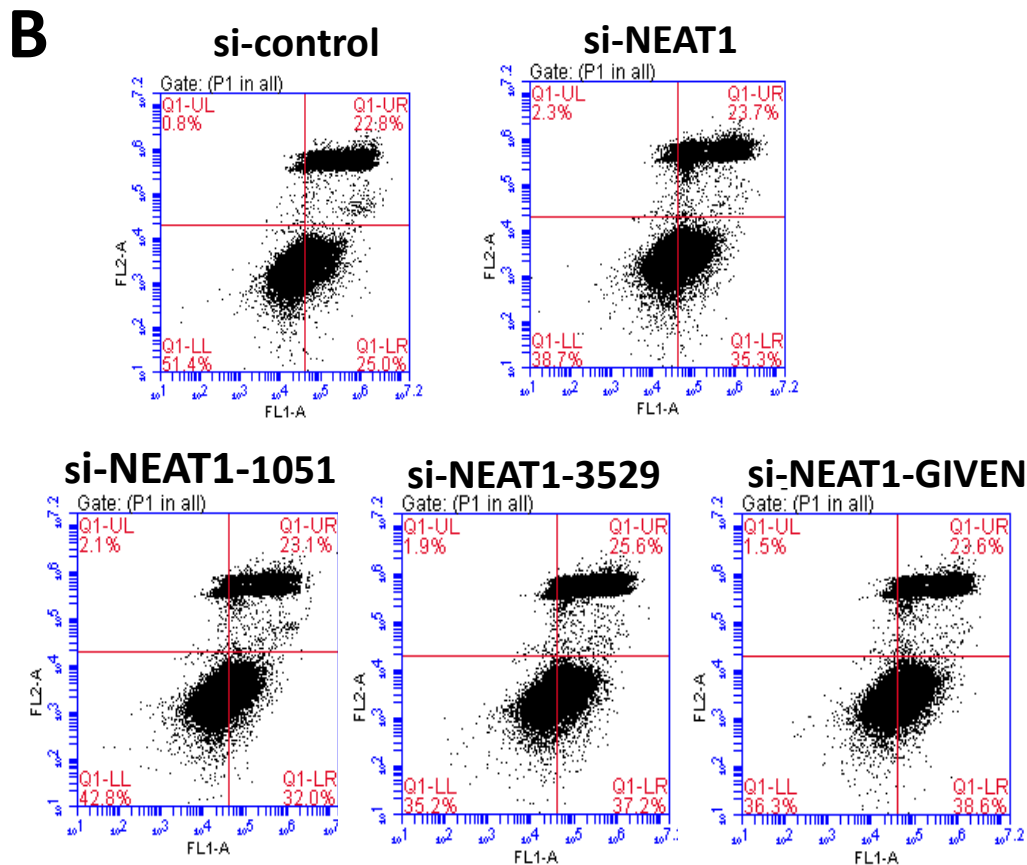

**Figure legend**

**Figure S1. Knockdown of NEAT1 inhibited cell growth in MDA-MB231.** MDA-MB231 cells were transfected with NEAT1-specific siRNA(50nM) and negative control siRNA(50nM). A) Knockdown efficiency was determined by qRT-PCR. B) The time-dependent effect of siRNA on cell growth is shown by the SRB assay. Results were quantitated from three independent experiments. Data are presented as means  $\pm$  SEM.

**Figure S2. Cell apoptosis could be induced by treated with different si-NEAT1.** MCF7 cells were transfected with NEAT1 50nM siRNAs targeted by different position of NEAT1. A) Knockdown efficiency was determined by qRT-PCR. B) Cell apoptosis was evaluated with Annexin-V and PI double-staining at 48 h by Flow cytometric analysis. Si-NEAT1-1051 and si-NEAT1-3529 stand for siRNA targeted the 1051 and 3529 position of NEAT1 RNA. Si-NEAT1-GIVEN represents the siRNA which used in the paper of Choudhry H et al, 2014.
